# Supplementary material for: Influence of light intensity, fertilizing and season on the cirsiliol content, a chemical marker of Leonotis nepetifolia (Lamiaceae)
Source: PeerJ. 2019 Jan 15;7:e6187. doi: 10.7717/peerj.6187 (PMC6338097; doi:10.7717/peerj.6187)
Supplement: Supplemental Information 1 [file peerj-07-6187-s001.docx]

**Influence of light intensity, fertilizing and season on the cirsiliol content, a chemical marker of *Leonotis nepetifolia* (Lamiaceae)**

**Supplementary material**

Table S1 **Content of cirsiliol per treatment and season**. Mean of values of cirsiliol content expressed as μg.mg-1 of extracts; US: unfertilized soil; FS: fertilized soil with 50% of earthworm humus; 0: plants grown without shading; 30: plants grown with 30% shading; 50: plants grown with 50% shading; 70: plants grown with 70% shading; Groups with lowercase letters present statistically significant difference when compared to their respective capital letters using two-way ANOVA and Tukey as post-test; the difference was considered significant when p < 0.05.

| **Treatment** | **Winter** | **Spring** | **Summer** | **Autumn** |
| --- | --- | --- | --- | --- |
| US 0 | 2.75 ± 0.01 | 5.04 ± 1.65 | 5.78 ± 3.19 | 4.37 ± 2.25 |
| FS 0 | 1.62 ± 0.61 | 2.66 ± 2.41 A | 6.43 ± 2.55a | 4.46 ± 1.77 |
| US 30 | 2.39 ± 0.78A | 2.68 ± 1.07b | 6.97 ± 2.22ª,B | 4.74 ± 1.02ª,b |
| FS 30 | 3.15 ± 1.39a | 2.36 ± 1.30a | 5.57 ± 2.35A | 4.27 ± 2.01 |
| US 50 | 2.37 ± 1.33a | 3.47 ± 1.40a | 6.85 ± 2.36A | 3.93 ± 0.28a |
| FS 50 | 1.56 ± 0.85a | 3.05 ± 1.66a | 6.06 ± 1.65A | 3.53 ± 1.34a |
| US 70 | 1.93 ± 0.62A | 2.46 ± 0.75 | 6.90 ± 2.29ª,b | 5.82 ± 2.81 |
| FS 70 | 0.66 ± 0.36A | 2.64 ± 1.68ª,B | 5.37 ± 1.09ª,b | 5.14 ± 2.40ª,b |

Table S2 **Height of plants per treatment**. Values in cm expressed as media ± standard deviation; US: unfertilized soil; FS: fertilized soil with 50% of earthworm humus; 0: plants grown without shading; 30: plants grown with 30% shading; 50: plants grown with 50% shading; 70: plants grown with 70% shading; Groups with lowercase letters present statistically significant difference when compared to their respective capital letters using two-way ANOVA and Tukey as post-test; the difference was considered significant when p < 0.05.

|  | **0** | **30** | **50** | **70** |
| --- | --- | --- | --- | --- |
| **US** | 38.00 ± 16.15A | 45.20 ± 6.76b,C | 41.75 ± 9.22b,d,E | 67.00 ± 11.73a,d,c,F |
| **FS** | 75.25 ± 9.95a,B | 94.00 ± 1.87a,c,D | 92.50 ± 16.90a,c,e | 113.8 ± 13.95a,b,c,f |
